# Supplementary material for: Arene–perfluoroarene interaction induced chiroptical inversion and precise ee% detection of chiral acids in a benzimidazole-involved ternary coassembly
Source: Royal Society of Chemistry journal article supplement (doi:10.1039/d1nr06254a), 2021-12-21
Supplement: d1nr06254a1.pdf [file d1nr06254a1.pdf]

1 **Arene-Perfluoroarene Interaction Induced Chiroptical Inversion and**  
2 **Precise ee% Detection for Chiral Acids in a Benzimidazole-Involved**  
3 **Ternary Coassembly**

4 Jianjian Zhao, Bo Wang, Aiyu Hao\* and Pengyao Xing\*

5 School of Chemistry and Chemical Engineering, Shandong University, Jinan 250100, Email:  
6 [haoay@sdu.edu.cn](mailto:haoay@sdu.edu.cn); [xingpengyao@sdu.edu.cn](mailto:xingpengyao@sdu.edu.cn)

7

8 **Experimental Section**

9 **Materials**

10 Tartaric acid (**TA**), malic acid (**MA**) and 1-pyrenecarboxylic acid were purchased from  
11 Shanghai Aladdin Biochemical Technology Co., Ltd. Dimethylsulfoxide (DMSO) was  
12 purchased from Jinan Saibo Instrument Co., Ltd. O-phenylenediamine and  
13 5-aminoisophthalic acid was bought from Bide Pharmatech Ltd. All water used in this work is  
14 deionized (DI) water.

15 **Computational details**

16 **Molecular dynamic (MD) simulation**

17 The geometries of **PBI**, *L*-**TA** and **OFN** were optimized by Gaussian View06 program, which  
18 were initially optimized, and the electrostatic potential (ESP) was simultaneously calculated  
19 by Hartree–Fork method at the B3LYP/6-31G (d) basis. The Antechamber program was used  
20 to fit the restrained electrostatic potential (RESP) charge, and then the general amber force  
21 field (GAFF) was adopted to parameterize the for subsequent MD simulations. The MD  
22 simulation of different assemblies were carried out as following. Take the structure of

1 **PBI/L-TA/OFN** (2/6/6 by molar ratio) as example. Firstly, we built a box with a length, width  
2 and height of 20, 15, 15 nm, respectively. And we insert 50 **PBI** molecules into the box by  
3 free dispersing. Then, 150 *L-MA* molecules are introducing into the box with the synergetic  
4 effect of H-bonded between **PBI** and *L-MA*,  $\pi$ - $\pi$  stacking between **PBI** as well as the  
5 intramolecular and intermolecular H-bonded of *L-MA* (with a  $\sim 2$  Å d-spacing). Next, 150  
6 **OFN** molecules are introducing into the box with the Arene-Perfluoroarene (AP) interaction  
7 between pyrene ring and **OFN**. Finally, the box was full of solvent (the water solvent  
8 simulated was the SPC216 model). The MD simulations of coassembly systems were carried  
9 out for 50 ns with a time step of 0.002 ps per integration step under the ensemble conditions  
10 of  $T = 298$  K. All MD simulations were implemented with the GROMACS 2020 program.

11

## 12 **Characterizations**

13 If not particularly indicated, all characterizations were carried out at room temperature.  
14 Transmission electron microscopy (TEM) images were recorded using a JEM-100CX II  
15 electron microscope (100 kV). Samples for TEM were prepared by dropping 20 mL aggregate  
16 solution on TEM copper grids, followed by air drying. X-ray diffraction (XRD) patterns were  
17 recorded on a PANalytical X'pert3 power diffractometer (40 kV, 40 mA) using Cu Ka  
18 radiation ( $\lambda = 0.15418$  nm). It should be noted that the whole measurement was divided into  
19 two parts comprising small angle (0.5–10 degree) and wide angle (10–50 degree) regions. For  
20 XRD, assembled systems were centrifuged to remove solvents and non-assembled species,  
21 and the obtained aggregates were spread evenly on glass slide and air-dried at room  
22 temperature. Proton nuclear magnetic resonance ( $^1\text{H}$  NMR) spectra were obtained on a Bruker

1 Advance 400 MHz instrument. Circular dichroism (CD) and Circular polarized light (CPL)  
2 spectra were measured with Applied Photophysics Chirascan.

### 3 **Sample preparation**

#### 4 **Suspension solutions for CD characterization**

5 In order to trigger coassembly, **PBI** and chiral acids (**TA** and **MA**) were dissolved in dimethyl  
6 sulfoxide (DMSO) and deionized water as concentrated stock solutions (100 mM),  
7 respectively. Then, **PBI** (2 mM) and different concentrations chiral acids aqueous solution  
8 were successively added into 5 mL vials. Taking the preparation of **PBI/L-MA** (**PBI** : **L-MA**  
9 = 2 mM : 6mM) assemblies as an example, **PBI** (55.4 mg, 0.1 mmol) and **L-MA** (15.2 mg, 0.1  
10 mmol) were dissolved in 1 mL DMSO (100 mM) and DI water (100 mM), respectively. Then,  
11 **PBI** stock solution (20  $\mu$ L) were taken out by pipettes into different 5 mL vial, following  
12 adding the mixed solution of **L-MA** stock solution (60  $\mu$ L) with DI water (920  $\mu$ L) by a  
13 pipette into the vital. The vial was sealed by a cap, and an aging period at least for 8 h at room  
14 temperature was applied.

#### 15 **Emulsion solutions for chiral sensing**

16 **PBI** and chiral acids (**TA** and **MA**) were dissolved in DMSO as concentrated stock solutions.  
17 In order to trigger the co-assembly, a certain amount of stock solutions of **PBI** and chiral acids  
18 were added into 5 mL bottle, followed by the addition the DI water. Taking the preparation of  
19 **PBI/L-MA** (**PBI** : **L-MA** = 0.5Mm : 5mM) assemblies as an example, **PBI** (55.4 mg, 0.1  
20 mmol) and **L-MA** (15.2 mg, 0.1 mmol) were dissolved in 1 mL DMSO (100 mM). Then, **PBI**  
21 and **L-MA** stock solution (5  $\mu$ L and 50 $\mu$ L, respectively) were taken out by pipettes into  
22 different 5 mL vial, following adding the DI water (945  $\mu$ L) by a pipette into the vital. The

1 vial was sealed by a cap, and an aging period at least for 8 h at room temperature was applied.

## 2 **Solid samples for CPL characterization**

3 In order to preparation CPL samples, co-assembly systems were centrifuged to obtain  
4 aggregates, and those aggregates were spread evenly on quartz plate and air-dried at room  
5 temperature.

## 6 **Synthesis of BI**

7 O-phenylenediamine (0.061 mol; 6.57 g) and 5-aminoisophthalic acid (0.028 mol; 5.00 g)  
8 were added to 50 mL of polyphosphoric acid in a 100 mL round-bottom flask. The mixture  
9 was heated and stirred at 180°C for 12 h. The resultant-colored melt was poured into 1000 ml  
10 of ice-cold water, when a solid precipitated out. The mixture was neutralized with saturation  
11 sodium bicarbonate solution with stirring 24 h and filtered. The solid was cleaned by DI water  
12 for 12 h and filtered. Finally, the solid recrystallized from methanol to get a clay brown  
13 product (8.2 g, yield ~ 90.0 %).

## 14 **Synthesis of PBI**

15 **BI** (1.00 g, 3.073 mmol), 1-pyrenecarboxylic acid (0.76 g, 3.073 mmol), triethylamine (1 mL,  
16 7.21 mmol), 1-Hydroxybenzotriazole (HOBt) (0.10 g, 0.740 mmol) and  
17 1-(3-Dimethylaminopropyl)-3-ethylcarbodiimide hydrochloride (EDC-HCl) (1.5 g, 7.82  
18 mmol) and 4-dimethylaminopyridine (DMAP) (0.10 g, 0.819 mmol) were added to 150 mL of  
19 N,N-dimethylformamide in a 250 mL round-bottom flask. The mixed solution was stirred at  
20 room temperature overnight. The reaction mixture was washed with DI water for four times (4  
21 × 100 mL). The organic phase was subjected to rotary evaporation to afford the crude product.  
22 After purifying by column (DCM/MeOH, 100:1), the final compound **PBI** (yellow powder,

1 yield ~ 65%) was obtained.

2

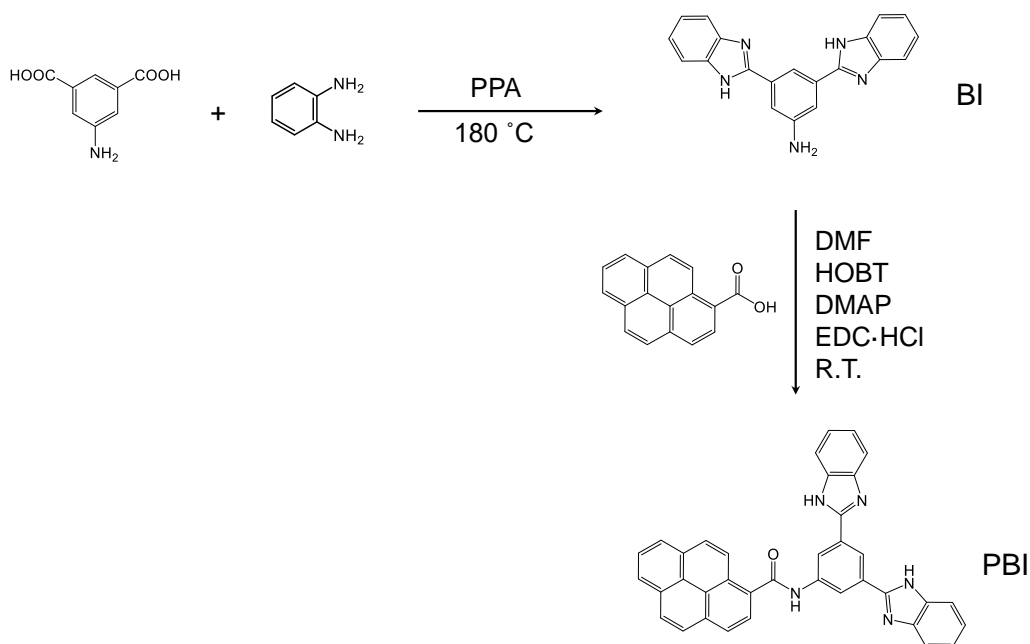

3

4 Scheme S1. Synthesis route of **PBI**.

5

6  $^1\text{H}$  NMR (400 MHz,  $d_6$ -DMSO, 298K)  $\delta$  13.22 (s, 2H, N=C-NH), 11.16 (s, H, C=O-NH), 8.81 (s, 3H,

7 Py-H), 8.65-8.67 (d, 1H, Py-H), 8.26-8.49 (m, 7H, Py-H and Ar-H), 7.16-8.20 (t, 1H, Py-H), 7.73-7.75 (d,

8 2H, Ar-H), 7.59-7.62 (d, 2H, Ar-H), 7.23-7.31 (m, 4H, Ar-H).  $^{13}\text{C}$  NMR (101 MHz,  $d_6$ -DMSO, 298K)  $\delta$

9 168.49, 151.25, 144.28, 140.85, 135.75, 132.56, 132.07, 131.84, 131.23, 130.69, 129.09, 128.54, 127.74,

10 127.23, 126.58, 126.34, 126.03, 125.00, 124.87, 124.35, 124.14, 123.27, 122.36, 120.83, 120.23, 119.41,

11 112.13, 49.07. HR-MALDI-MS: calcd. for  $[\text{M}+\text{H}]^+$ , 554.19. Found: 554.20.

12

1

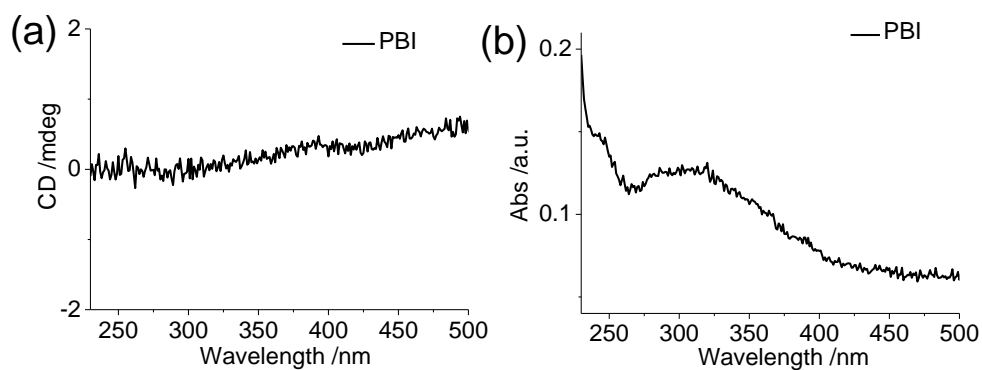

2

3 Figure S1. CD and UV spectra of **PBI** (a,b) individual assemblies.

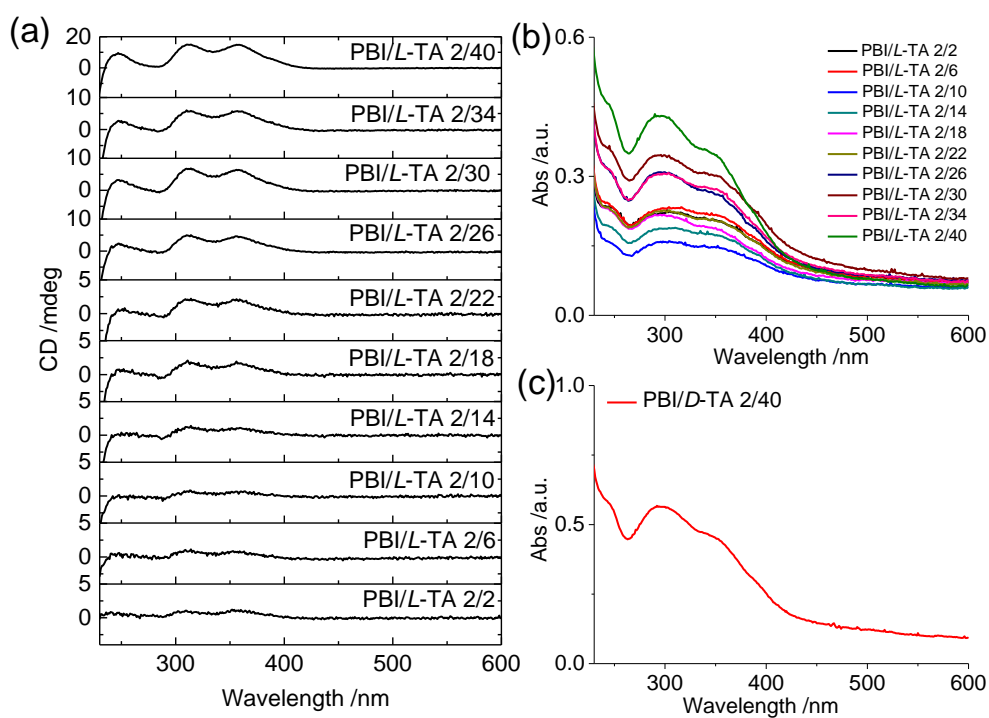

4

5 Figure S2. CD and UV spectra of **PBI** in the presence different concentrations of **L-TA** (a,b)

6 as well as the UV spectra of **PBI/D-LA** (2/40 by molar ratio) (c).

7

8

9

10

11

12

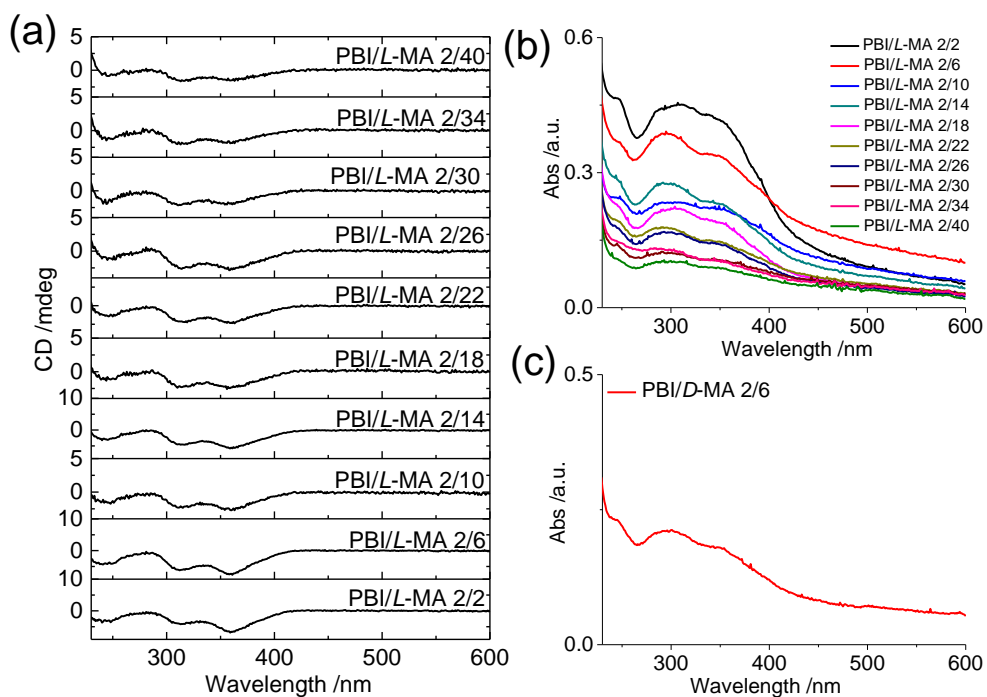

1  
 2 Figure S3. CD and UV spectra of **PBI** in the presence different concentrations of *L-MA* (a,b)  
 3 as well as the UV spectra of **PBI/D-MA** (2/6 by molar ratio) (c).

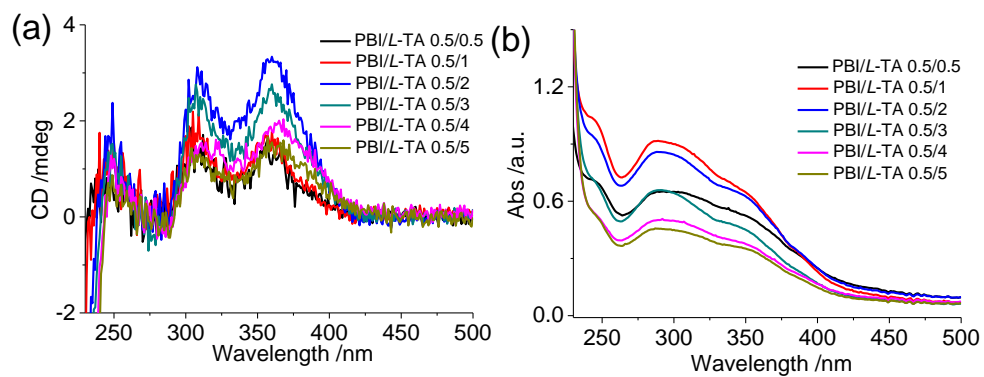

4  
 5 Figure S4. CD and UV spectra of **PBI** in the presence different concentrations of *L-TA* (a,b).

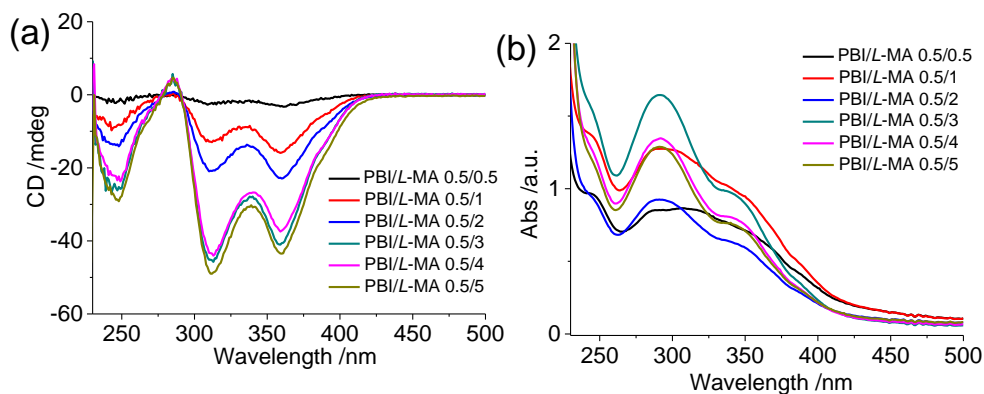

6

1 Figure S5. CD and UV spectra of **PBI** in the presence different concentrations of **L-MA** (a,b).

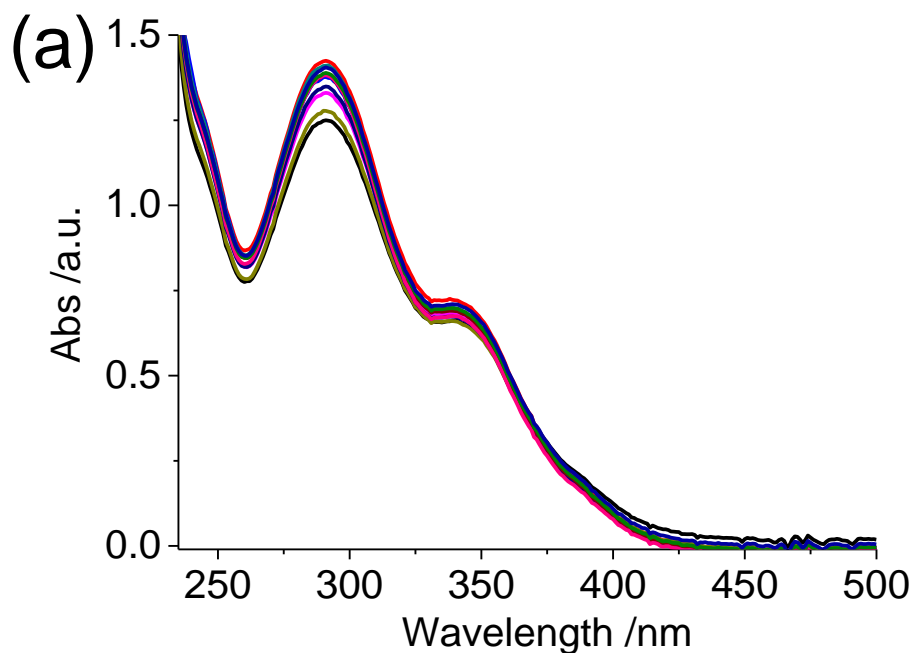

2

3 Figure S6. UV spectra of **PBI/MA** (0.5/5 by molar ratio) (a).

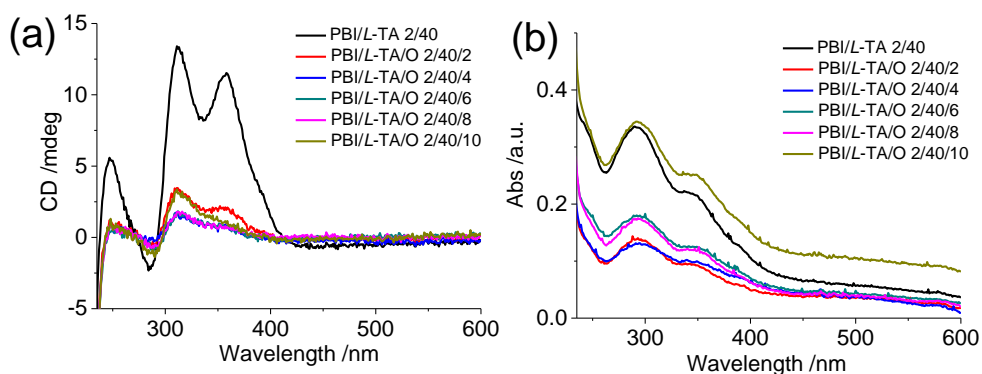

4

5 Figure S7. CD and UV spectra of **PBI/L-TA** (2/40) in the presence different concentrations of

6

**OFN** (a,b).

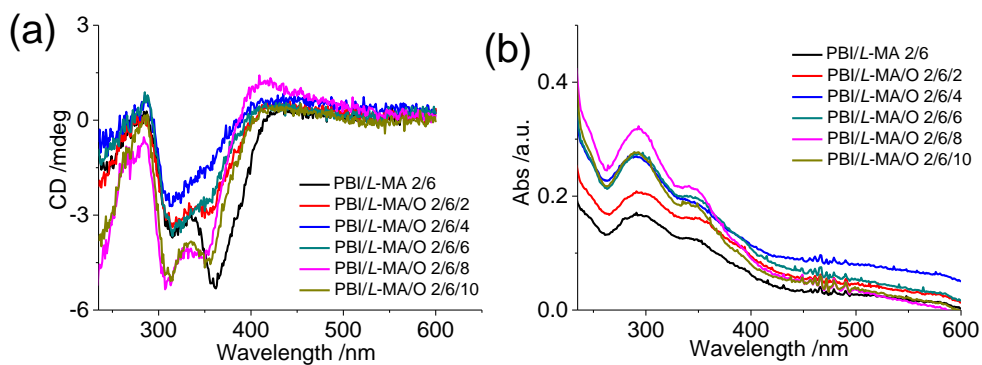

7



1 Figure S8. CD and UV spectra of **PBI/L-MA (2/6)** in the presence different concentrations of  
2 **OFN (a,b)**.

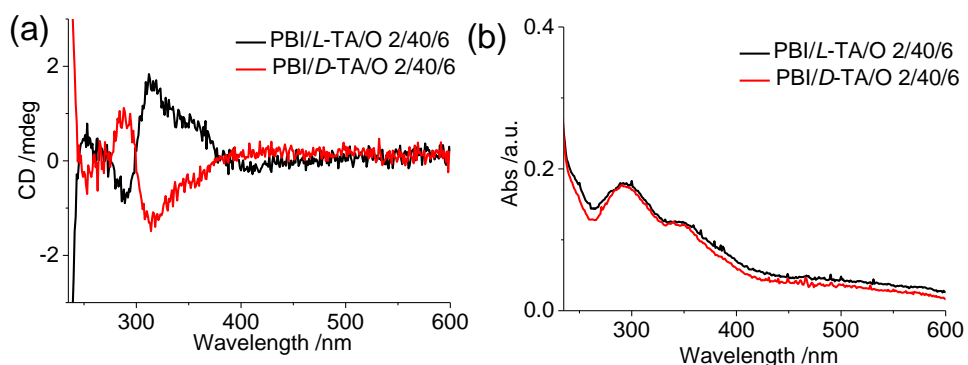

3  
4 Figure S9. CD and UV spectra of **PBI/L-TA/OFN (2/40/6)** (a,b).

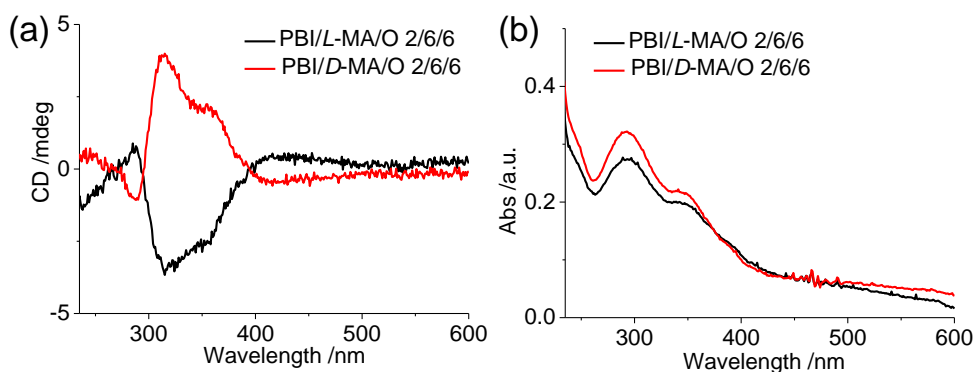

5  
6 Figure S10. CD and UV spectra of **PBI/L-MA/OFN (2/6/6)** (a,b).

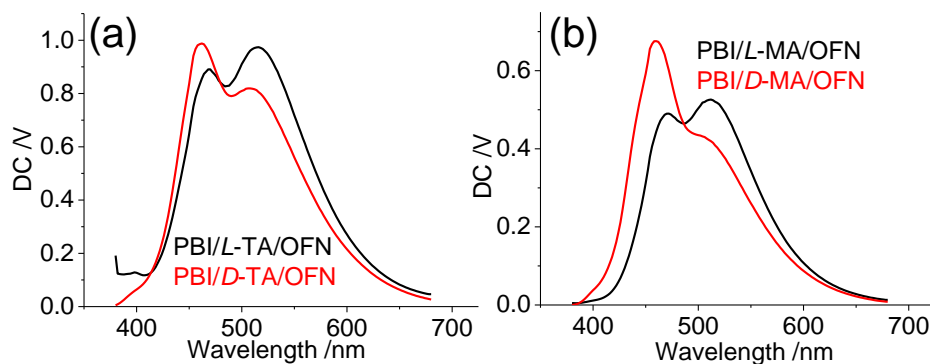

7  
8 Figure S11. Fluorescence spectra of **PBI/L-TA/OFN (2/40/6)** and **PBI/L-MA/OFN (2/6/6)**  
9 (a,b).

10  
11

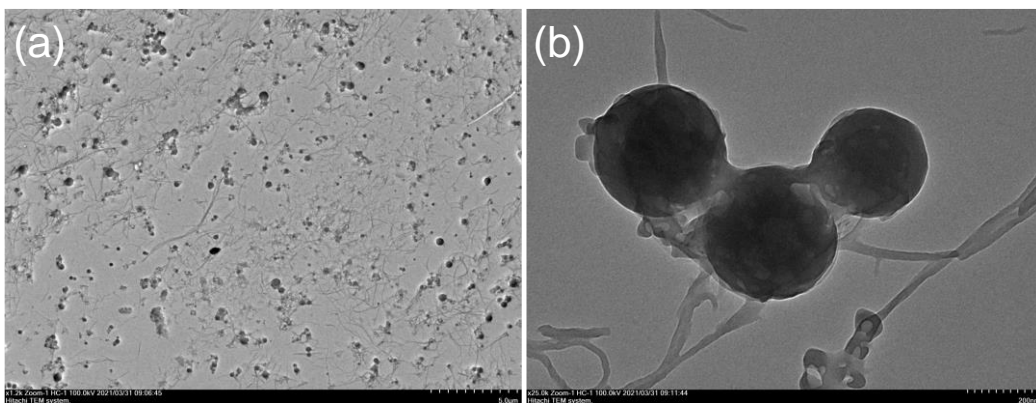

1

2

Figure S12. TEM images of **PBI** (2 mM).

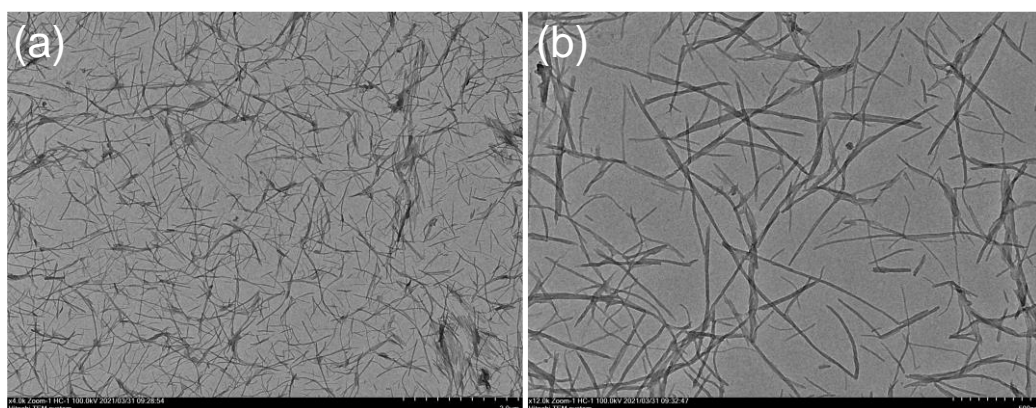

3

4

Figure S13. TEM images of **PBI/L-TA** (2/40 by molar ratio).

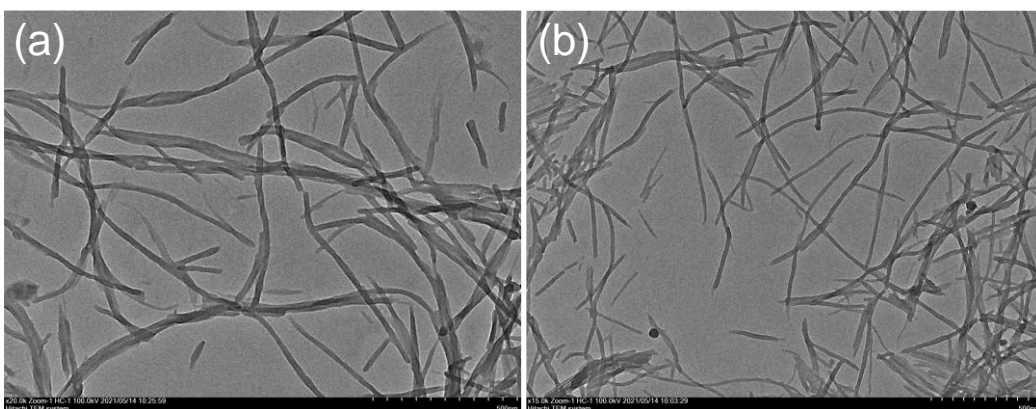

5

6

Figure S14. TEM images of **PBI/D-TA** (2/40 by molar ratio).

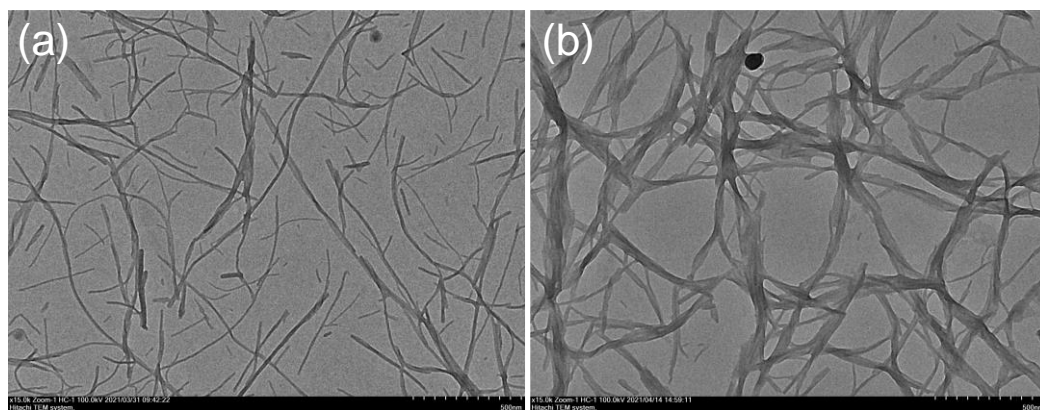

1

2

Figure S15. TEM images of **PBI/L-MA** (2/6 by molar ratio).

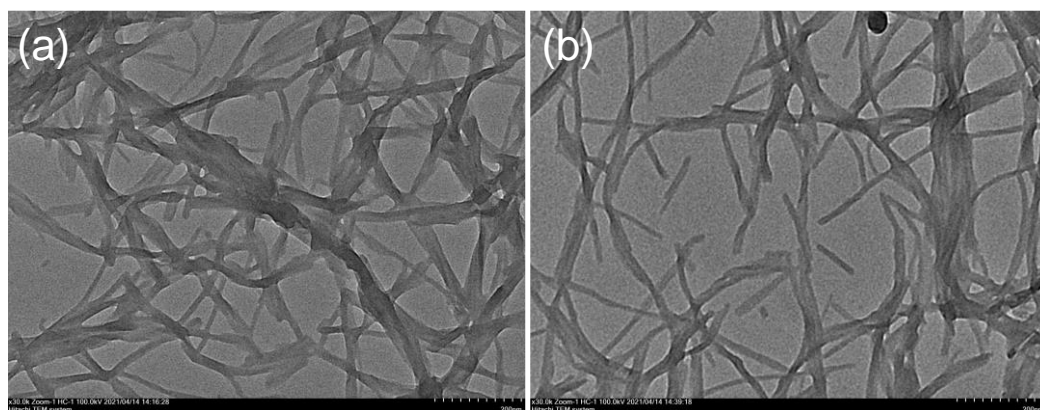

3

4

Figure S16. TEM images of **PBI/D-MA** (2/6 by molar ratio).

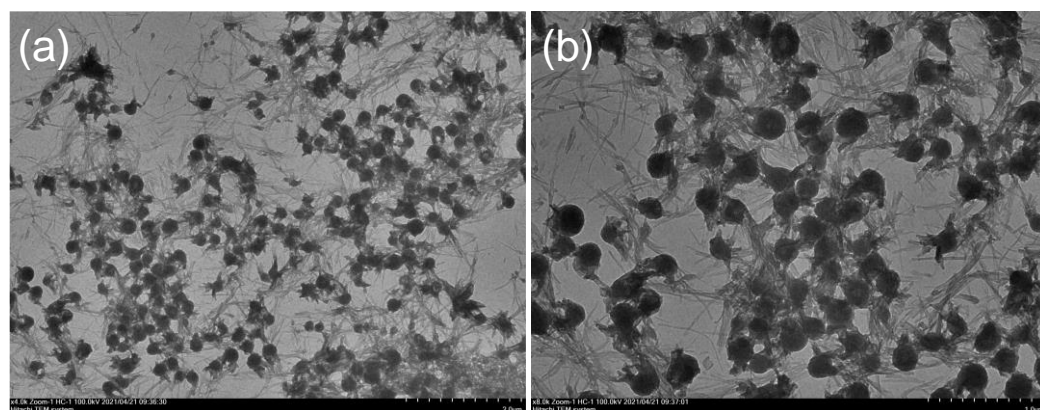

5

6

Figure S17. TEM images of **PBI/L-TA** (2/40/6 by molar ratio).

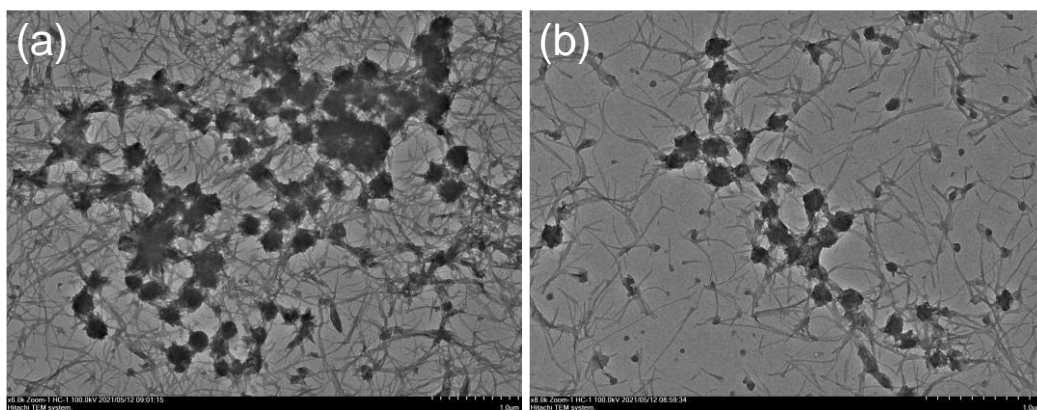

1

2

Figure S18. TEM images of **PBI/L-MA** (2/6/6 by molar ratio).

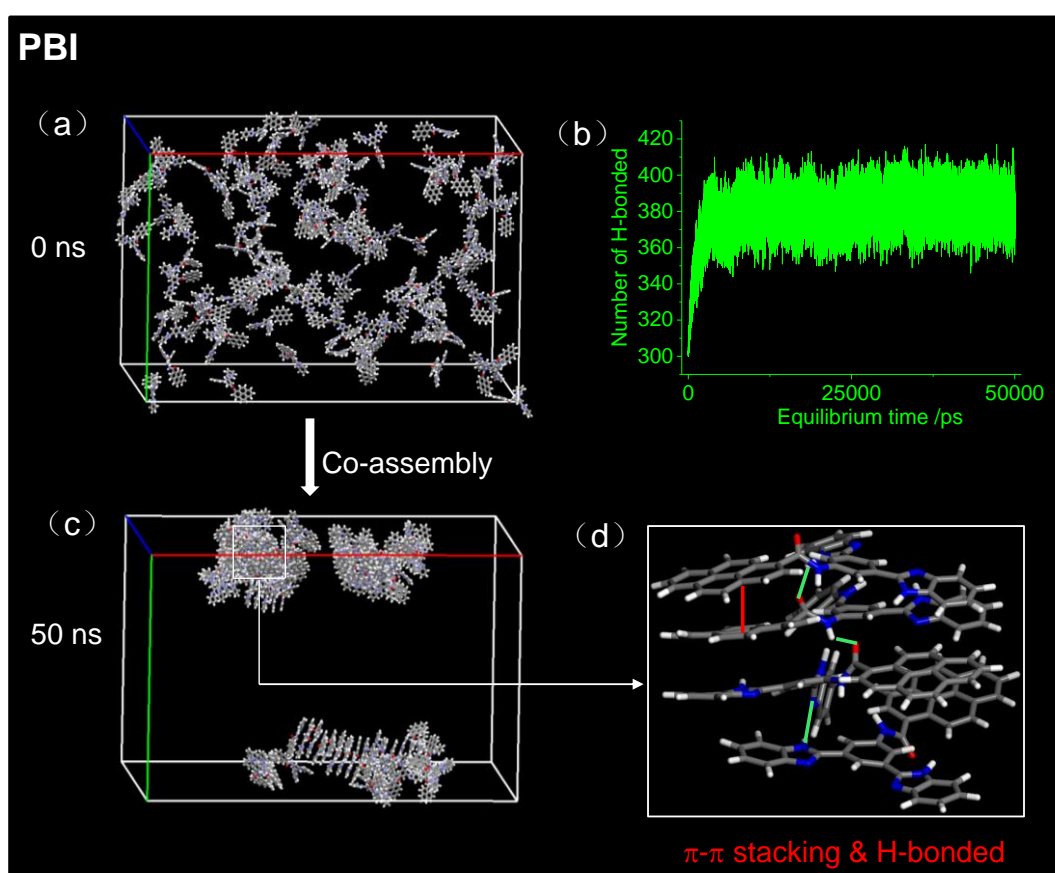

3

4 Figure S19. (a-d) The detailed MD snapshots of **PBI** at 0 and 50ns, respectively and the

5 number of H-bonded along with simulation time.

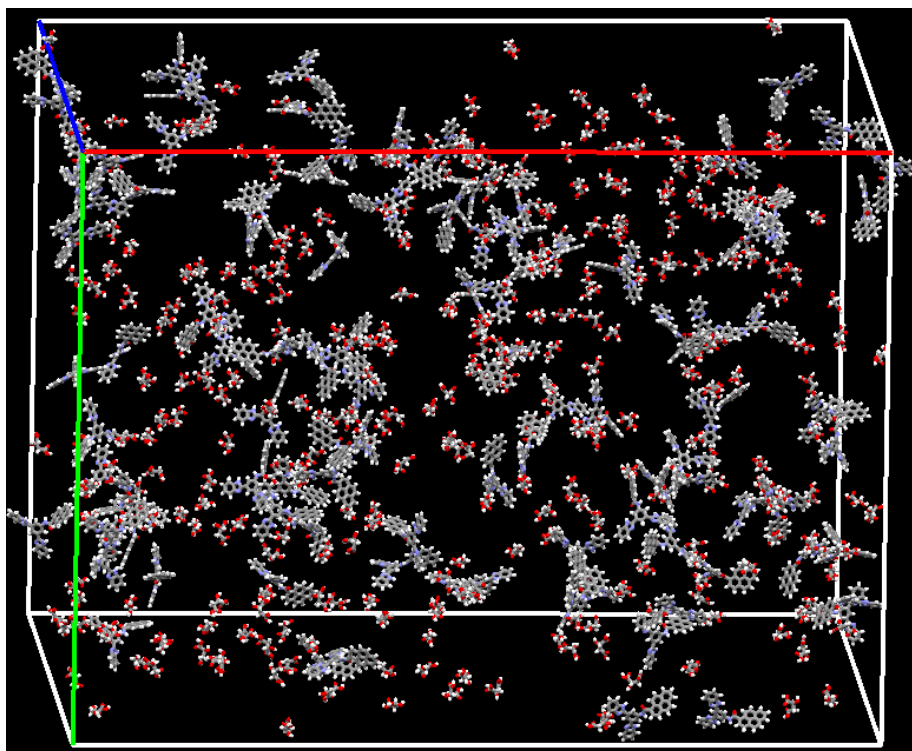

1

2 Figure S20. (a,c,d) The detailed MD snapshots of **PBI** at 0 ns.

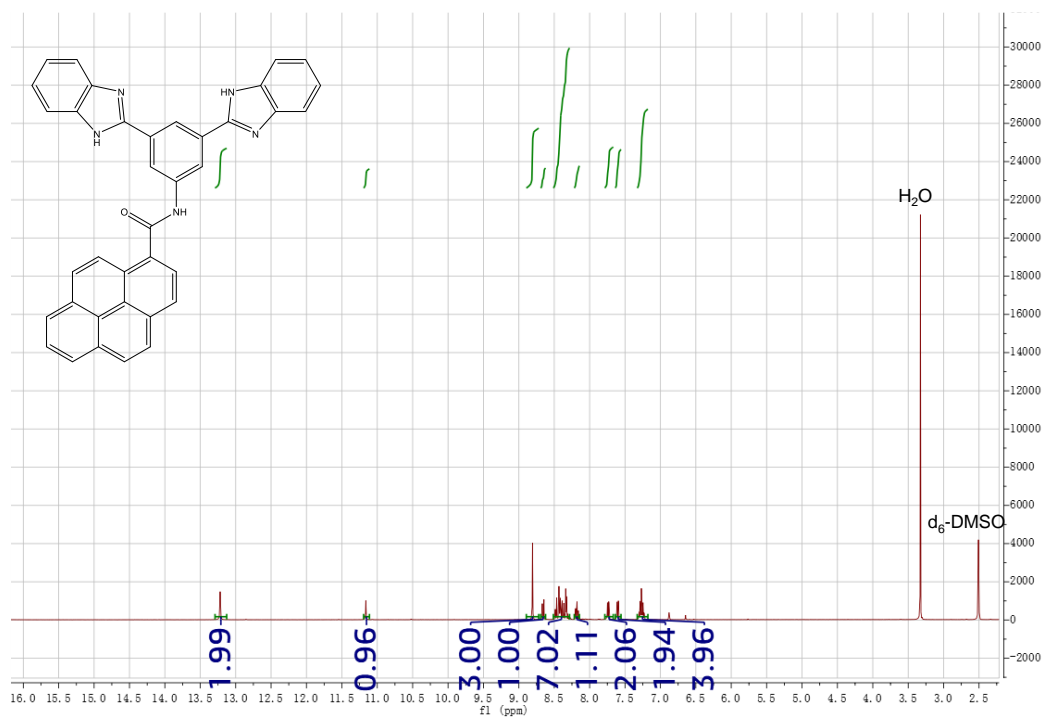

3

4 Figure S21.  $^1\text{H-NMR}$  spectrum (400 MHz,  $\text{d}_6\text{-DMSO}$ , 298 K) of **PBI**.

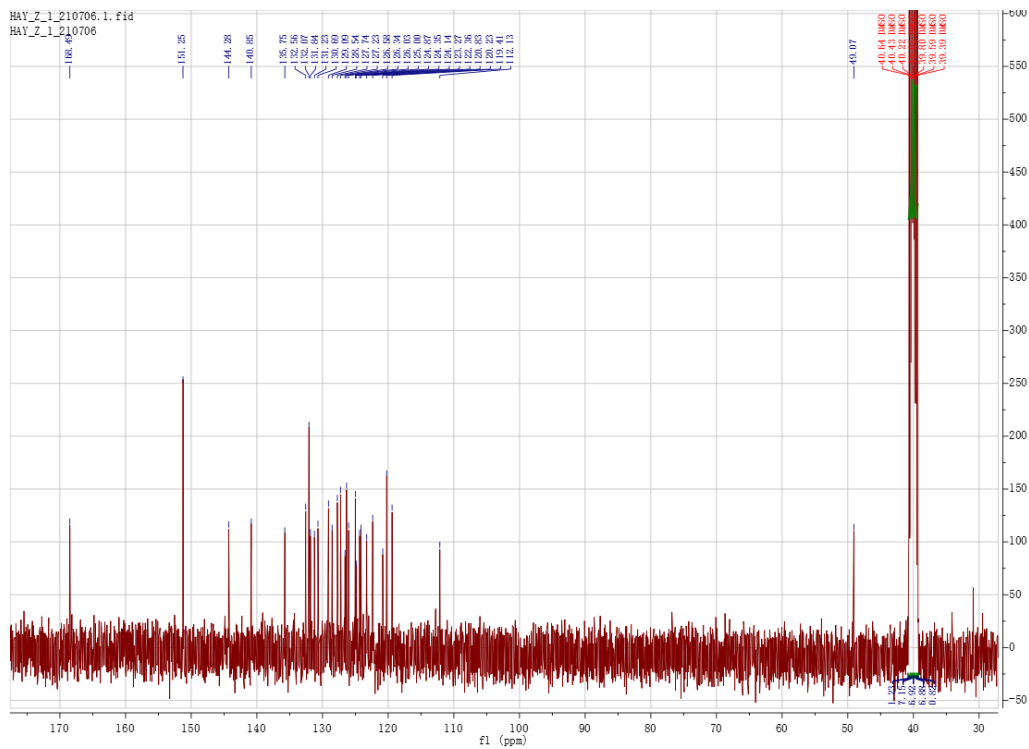

1

2 Figure S22.  $^{13}\text{C}$ -NMR spectrum (101 MHz,  $d_6$ -DMSO, 298 K) of **PBI**.

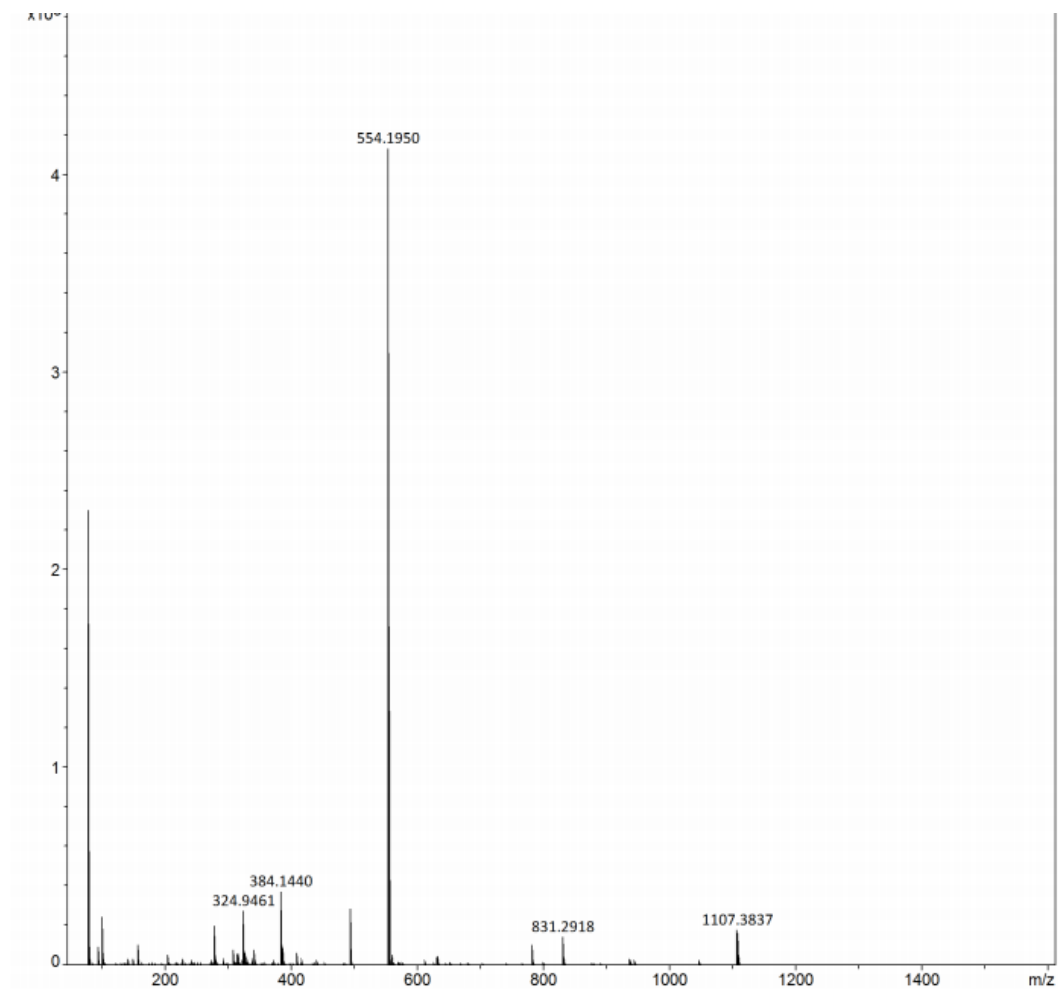

3

1 Figure S23. HR-MALDI-TOF mass spectrum of **PBI**.
